# Supplementary material for: Establishing the Link across the Synthesis Reaction Kinetics, Structural Changes, and Photocatalytic Efficiency of an Enhanced Chitosan–Clay (1:3) Nanocomposite
Source: MDPI journal article supplement (doi:10.3390/solids5020015), 2024-04-25
Supplement: s1 [file s1]

**Supplementary Materials:** Establishing the Link Across the Synthesis Reaction Kinetics, Structural Changes, and Photocatalytic Efficiency of an En-hanced Chitosan-Clay (1:3) Nanocomposite

Wael ALBOUCHI, Malek Lahbib, Chadha MEJRI , Sana JEBALI, Mahdi Meftah, Walid OUESLATI\* 

Table S1: The commercialized CS specifications given by the supplier (Glentham life sciences (Wiltshire, UK))

| Commercialized CS Specifdications | Value              |
|-----------------------------------|--------------------|
| Degree of Deacetylation           | $\geq 90.0\%$      |
| Sulphated Ash                     | $\leq 1.0\%$       |
| Viscosity (1% in 1% AcOH, 20°C)   | from 100 - 300 cps |
| Water                             | $\leq 8.0\%$       |
| Solubility (in acetic acid)       | $\leq 99\%$        |
| pH (1% in water, 20°C)            | 6.0 - 8.0          |

**Supplementary Materials:** Establishing the Link Across the Synthesis Reaction Kinetics, Structural Changes, and Photocatalytic Efficiency of an En-hanced Chitosan-Clay (1:3) Nanocomposite

Wael ALBOUCHI, Malek Lahbib, Chadha MEJRI , Sana JEBALI, Mahdi Meftah, Walid OUESLATI\* 

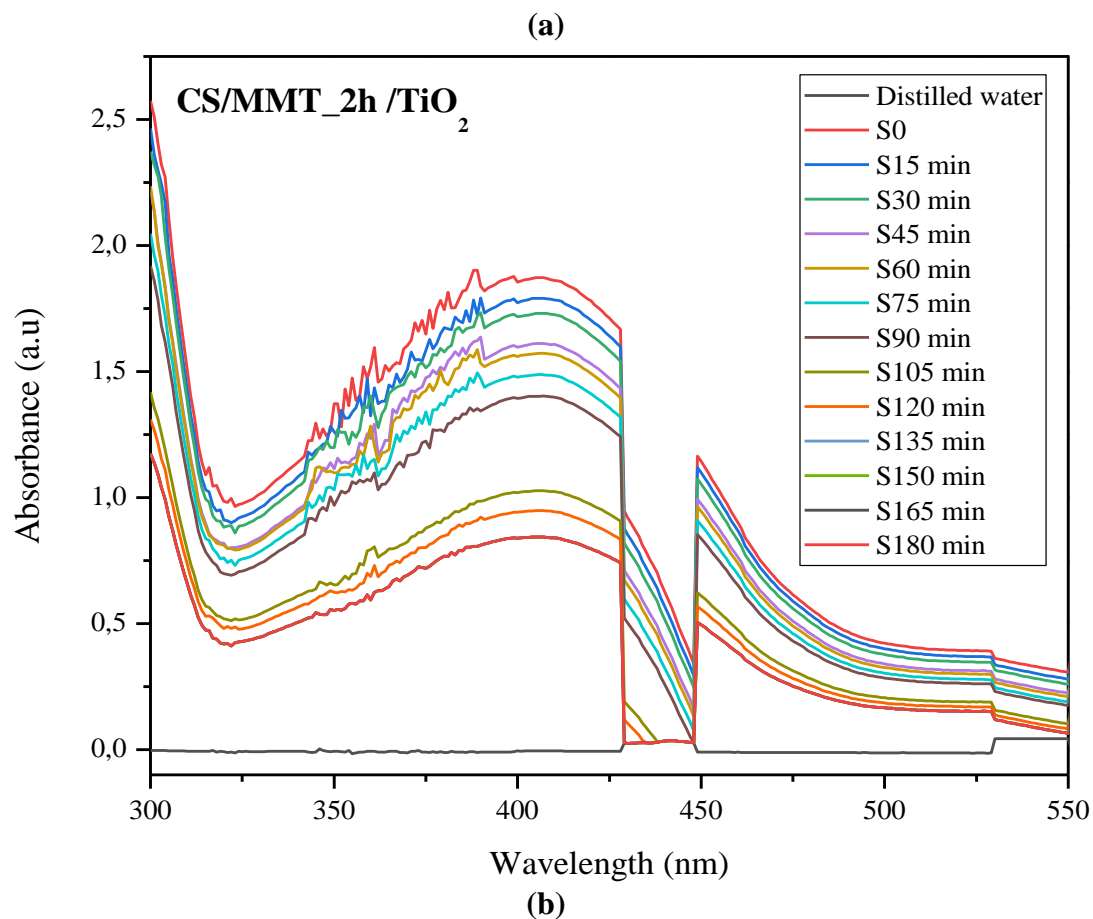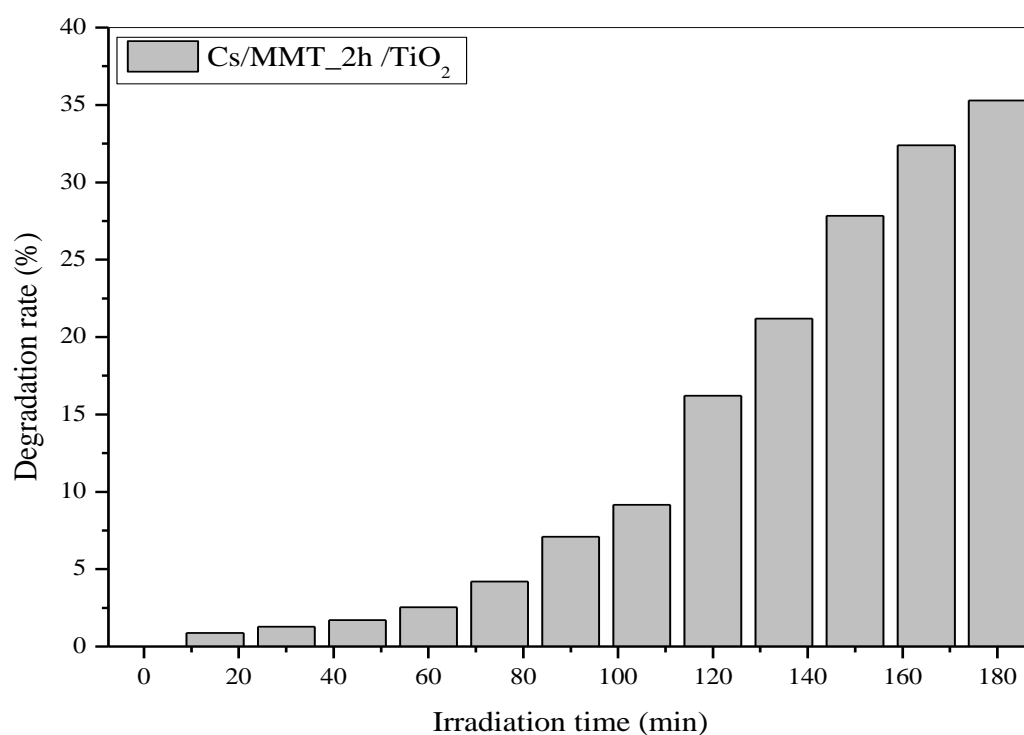

**Supplementary Materials:** Establishing the Link Across the Synthesis Reaction Kinetics, Structural Changes, and Photocatalytic Efficiency of an En-hanced Chitosan-Clay (1:3) Nanocomposite

Wael ALBOUCHI, Malek Lahbib, Chadha MEJRI , Sana JEBALI, Mahdi Meftah, Walid OUESLATI\* 

Figure S1: To be continued.

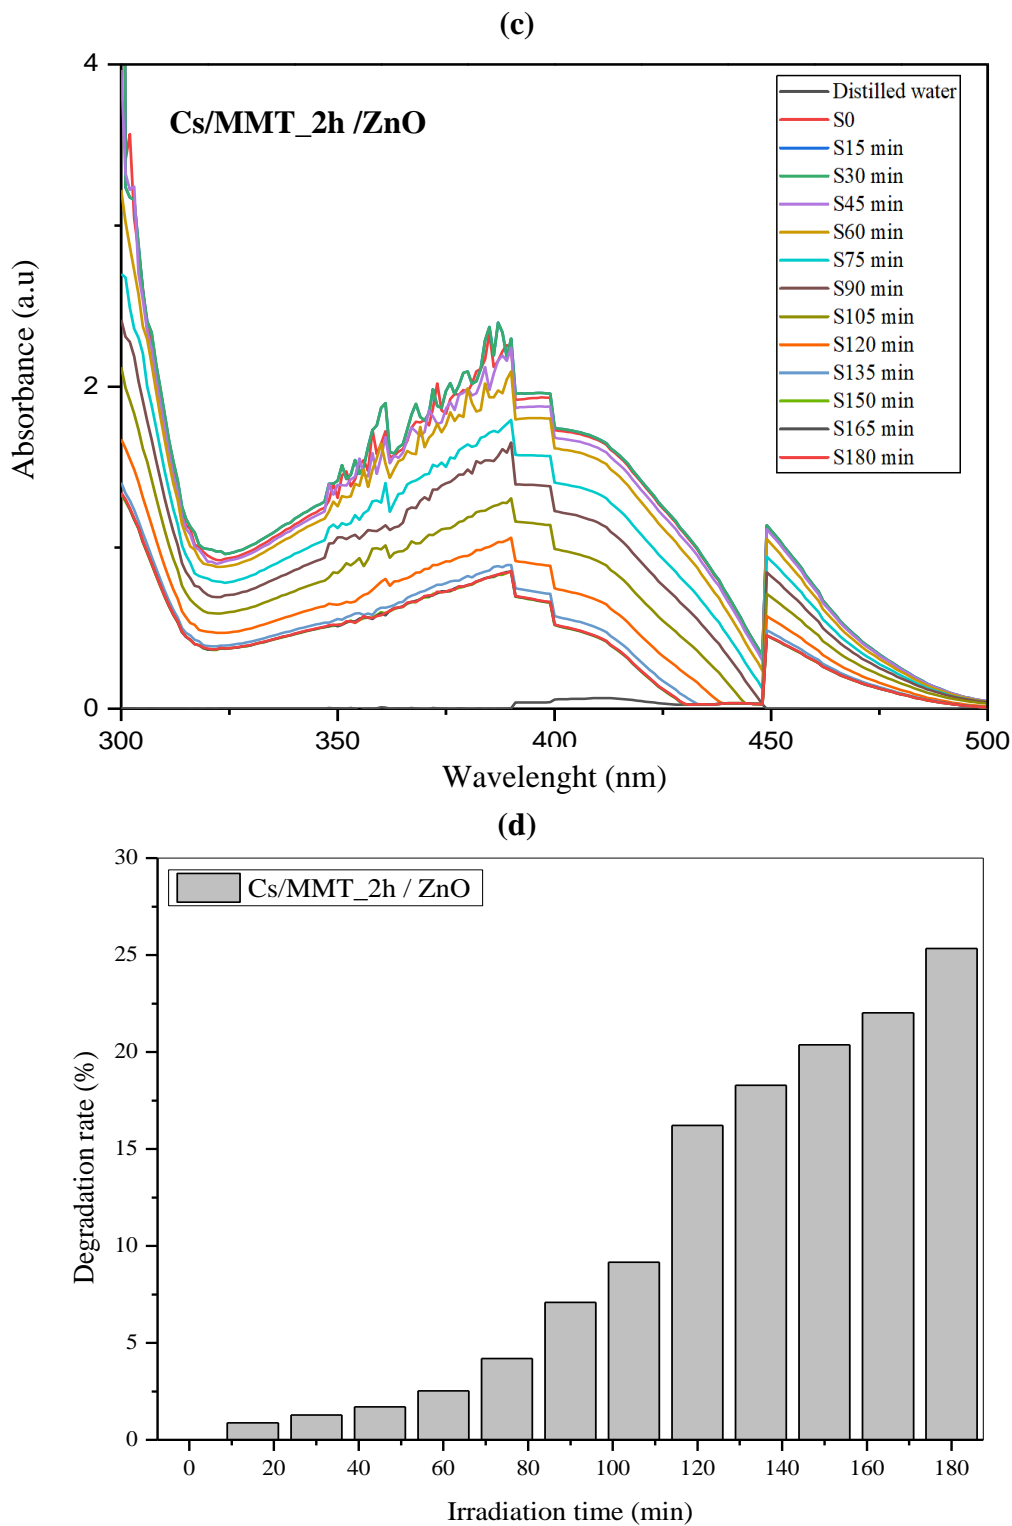

Figure S1: (a) Catalytic degradation of CBY3G-P by Cs/MMT nanocomposites 2h in the presence of  $\text{TiO}_2$ , (b) Photocatalytic degradation rate of CBY3G-P dye on Cs/MMT,  $\text{TiO}_2$  2h under 180 min of irradiation, (c)

**Supplementary Materials:** Establishing the Link Across the Synthesis Reaction Kinetics, Structural Changes, and Photocatalytic Efficiency of an En-hanced Chitosan-Clay (1:3) Nanocomposite

Wael ALBOUCHI, Malek Lahbib, Chadha MEJRI , Sana JEBALI, Mahdi Meftah, Walid OUESLATI\* 

Catalytic degradation of CBY3G-P by Cs/MMT nanocomposites 2h in the presence of ZnO, and (d) Photocatalytic degradation rate of CBY3G-P dye on Cs/MMT, ZnO 2h under 180 min of irradiation.

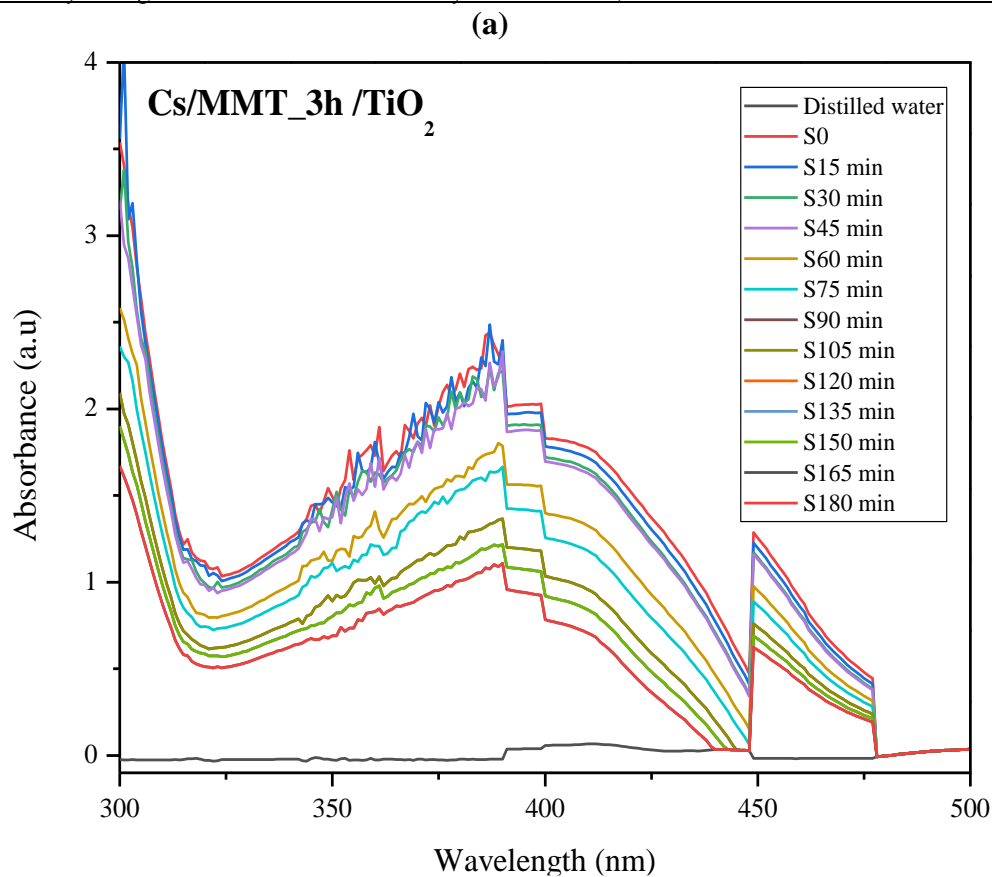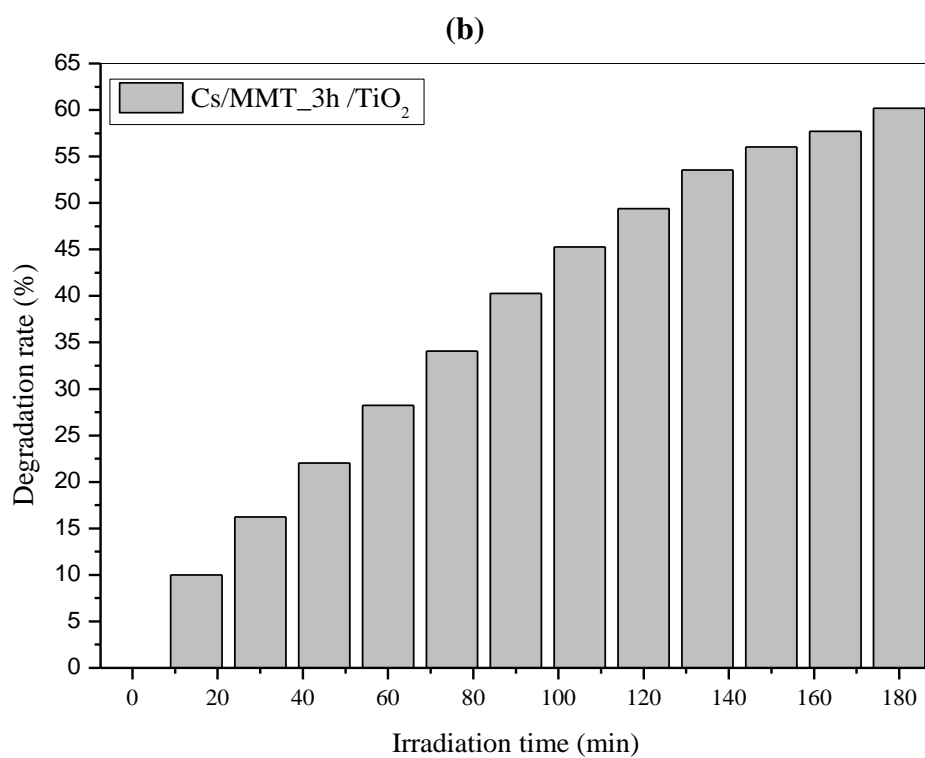

**Supplementary Materials:** Establishing the Link Across the Synthesis Reaction Kinetics, Structural Changes, and Photocatalytic Efficiency of an En-hanced Chitosan-Clay (1:3) Nanocomposite

Wael ALBOUCHI, Malek Lahbib, Chadha MEJRI , Sana JEBALI, Mahdi Meftah, Walid OUESLATI\* 

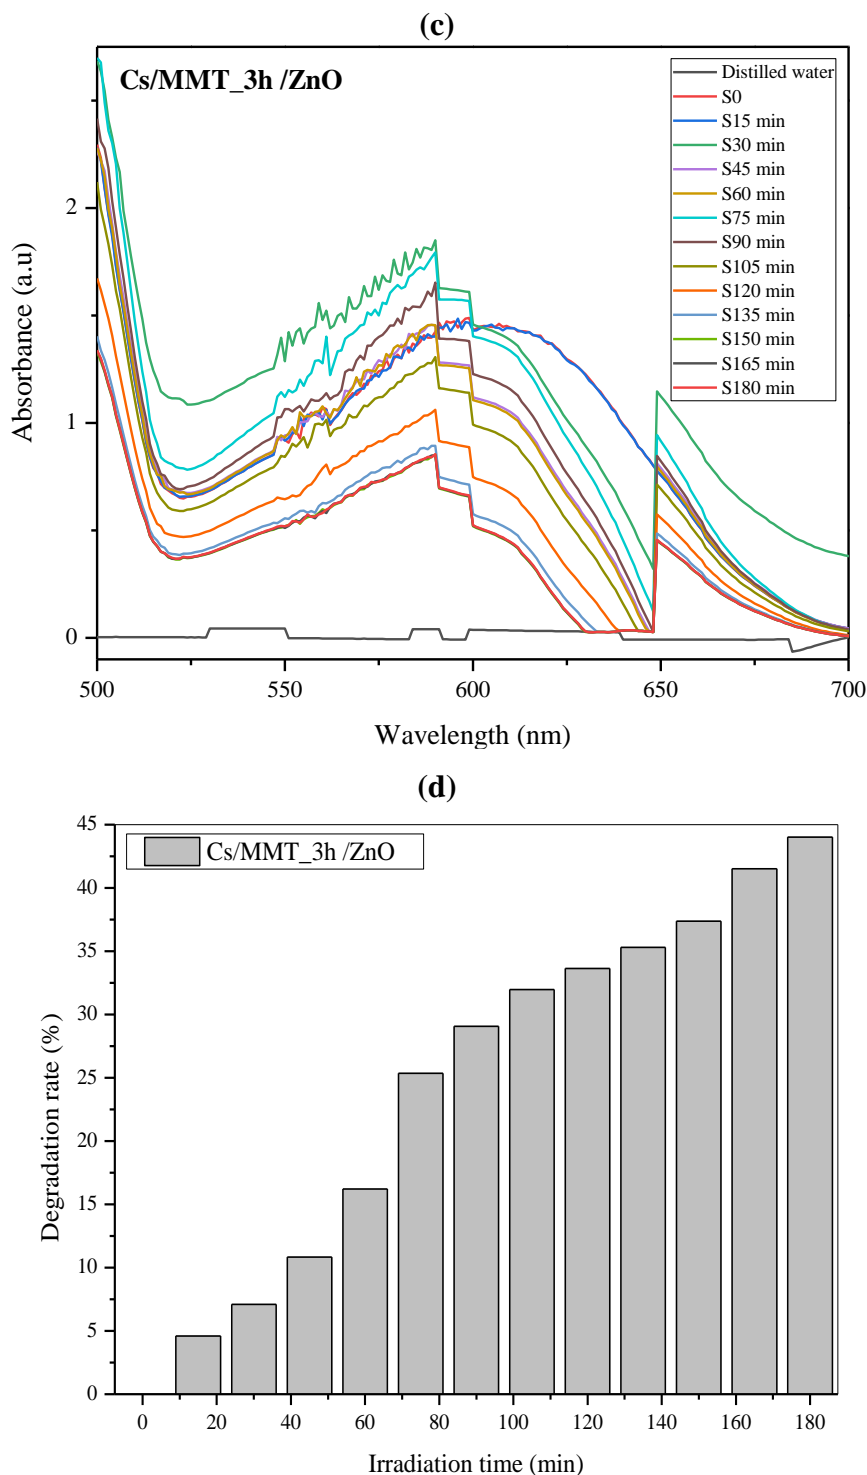

**Figure S2:** (a) Catalytic degradation of CBY3G-P by Cs/MMT nanocomposites 3h in the presence of TiO<sub>2</sub>, (b) Photocatalytic degradation rate of CBY3G-P dye on Cs/MMT, TiO<sub>2</sub> 3h under 180 min of irradiation, (c)

**Supplementary Materials:** Establishing the Link Across the Synthesis Reaction Kinetics, Structural Changes, and Photocatalytic Efficiency of an En-hanced Chitosan-Clay (1:3) Nanocomposite

Wael ALBOUCHI, Malek Lahbib, Chadha MEJRI , Sana JEBALI, Mahdi Meftah, Walid OUESLATI\* 

Catalytic degradation of CBY3G-P by Cs/MMT nanocomposites 3h in the presence of ZnO, and (d) Photocatalytic degradation rate of CBY3G-P dye on Cs/MMT, ZnO 3h under 180 min of irradiation.

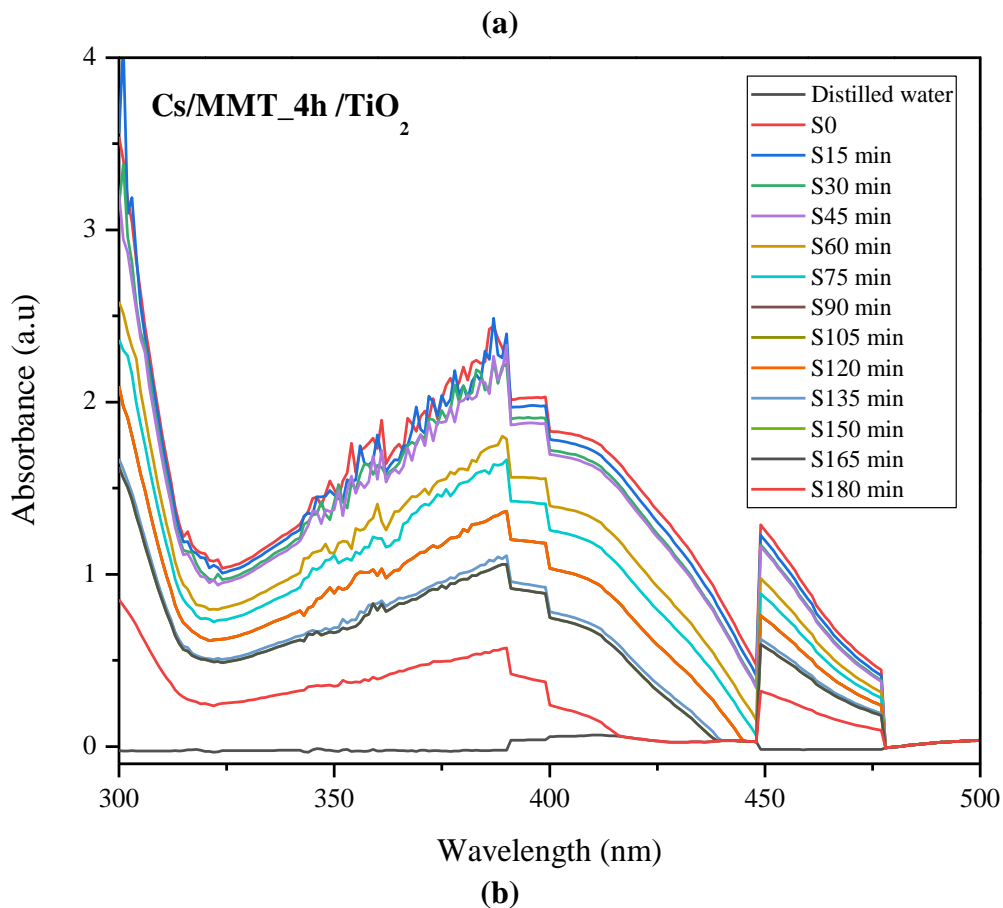

**Supplementary Materials:** Establishing the Link Across the Synthesis Reaction Kinetics, Structural Changes, and Photocatalytic Efficiency of an En-hanced Chitosan-Clay (1:3) Nanocomposite

Wael ALBOUCHI, Malek Lahbib, Chadha MEJRI , Sana JEBALI, Mahdi Meftah, Walid OUESLATI\* 

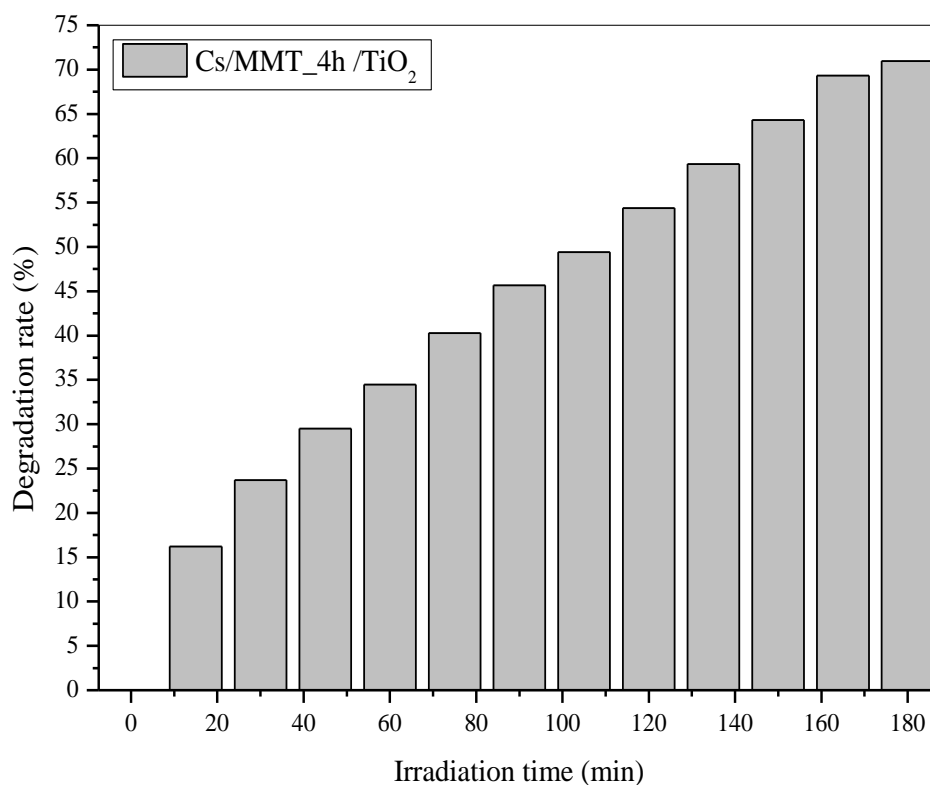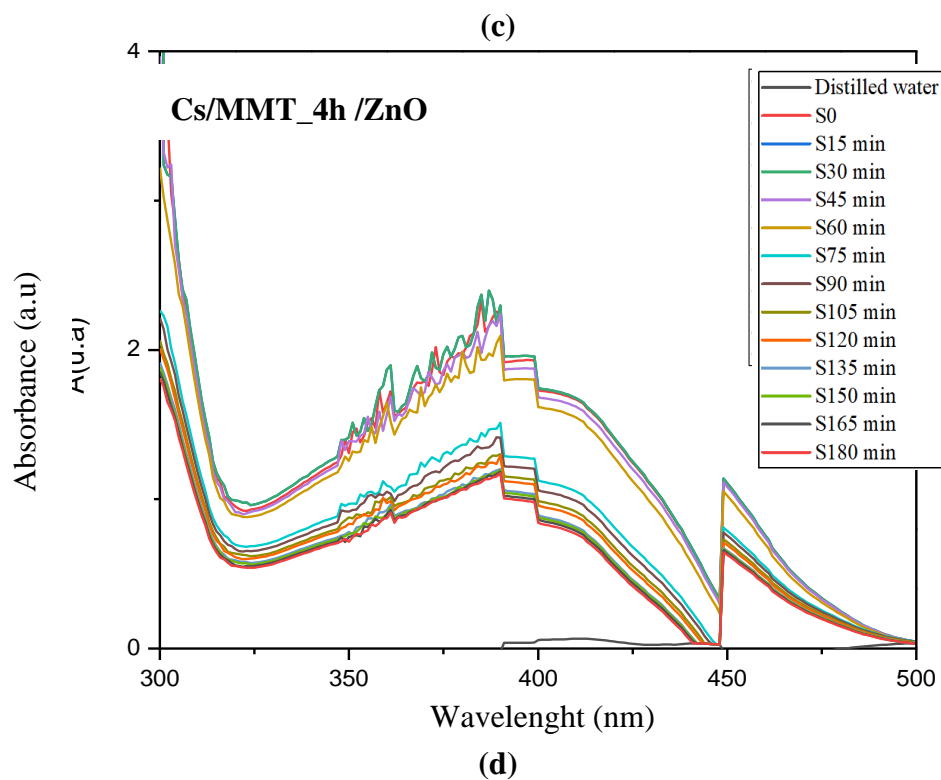

**Supplementary Materials:** Establishing the Link Across the Synthesis Reaction Kinetics, Structural Changes, and Photocatalytic Efficiency of an En-hanced Chitosan-Clay (1:3) Nanocomposite

Wael ALBOUCHI, Malek Lahbib, Chadha MEJRI , Sana JEBALI, Mahdi Meftah, Walid OUESLATI\* 

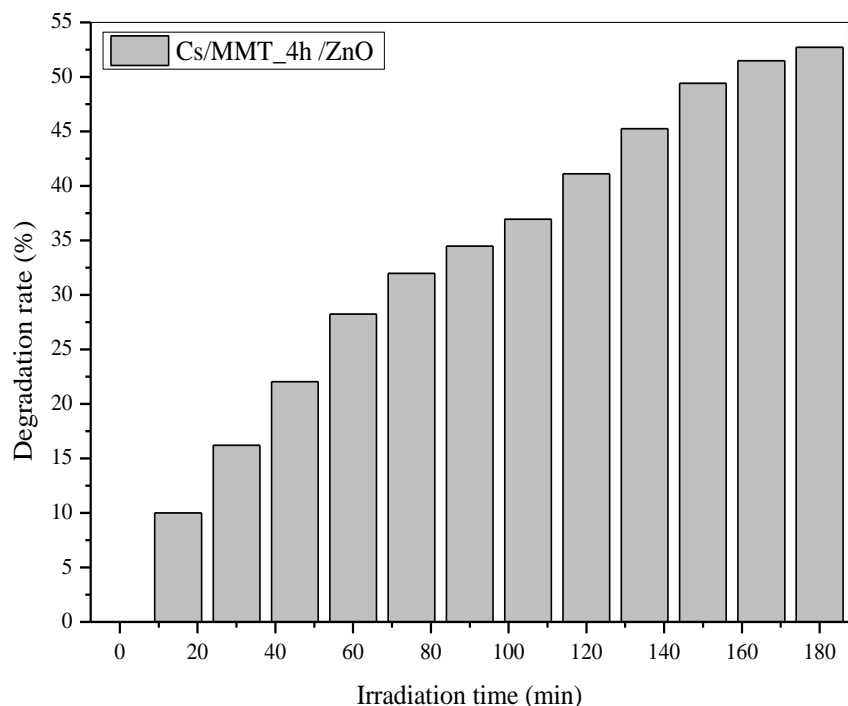

**Figure S3:** (a) Catalytic degradation of CBY3G-P by Cs/MMT nanocomposites 4h in the presence of  $\text{TiO}_2$ , (b) Photocatalytic degradation rate of CBY3G-P dye on Cs/MMT,  $\text{TiO}_2$  4h under 180 min of irradiation, (c) Catalytic degradation of CBY3G-P by Cs/MMT nanocomposites 4h in the presence of ZnO, and (d) Photocatalytic degradation rate of CBY3G-P dye on Cs/MMT, ZnO 4h under 180 min of irradiation.

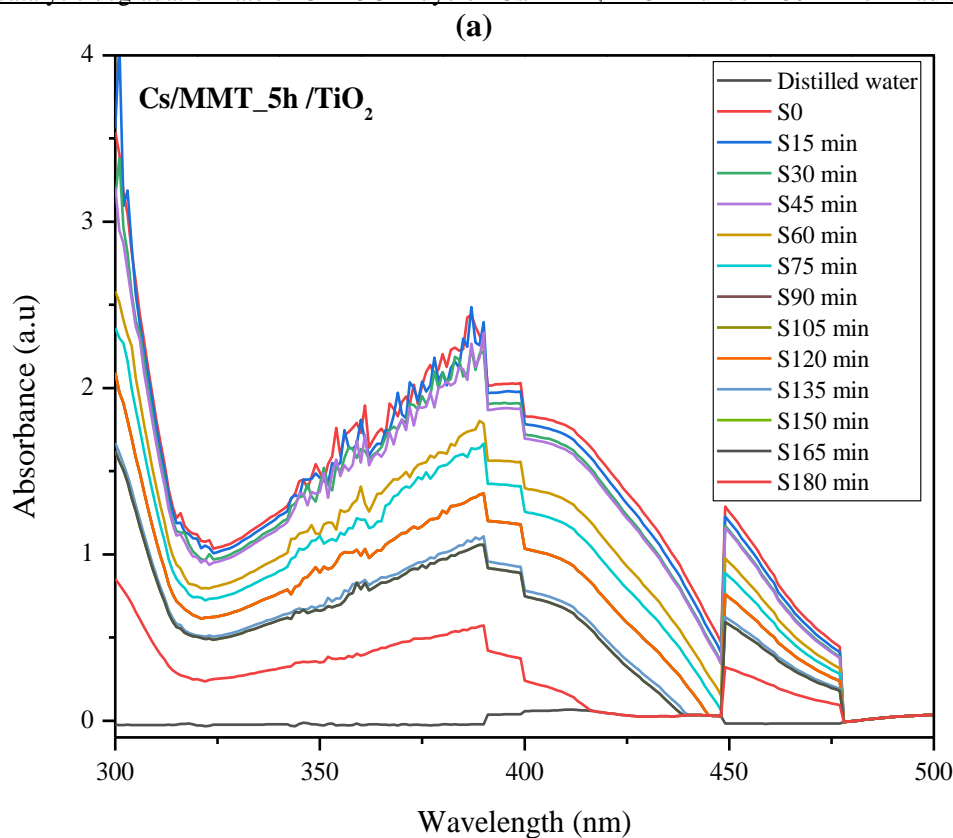

**Supplementary Materials:** Establishing the Link Across the Synthesis Reaction Kinetics, Structural Changes, and Photocatalytic Efficiency of an En-hanced Chitosan-Clay (1:3) Nanocomposite

Wael ALBOUCHI, Malek Lahbib, Chadha MEJRI , Sana JEBALI, Mahdi Meftah, Walid OUESLATI\* 

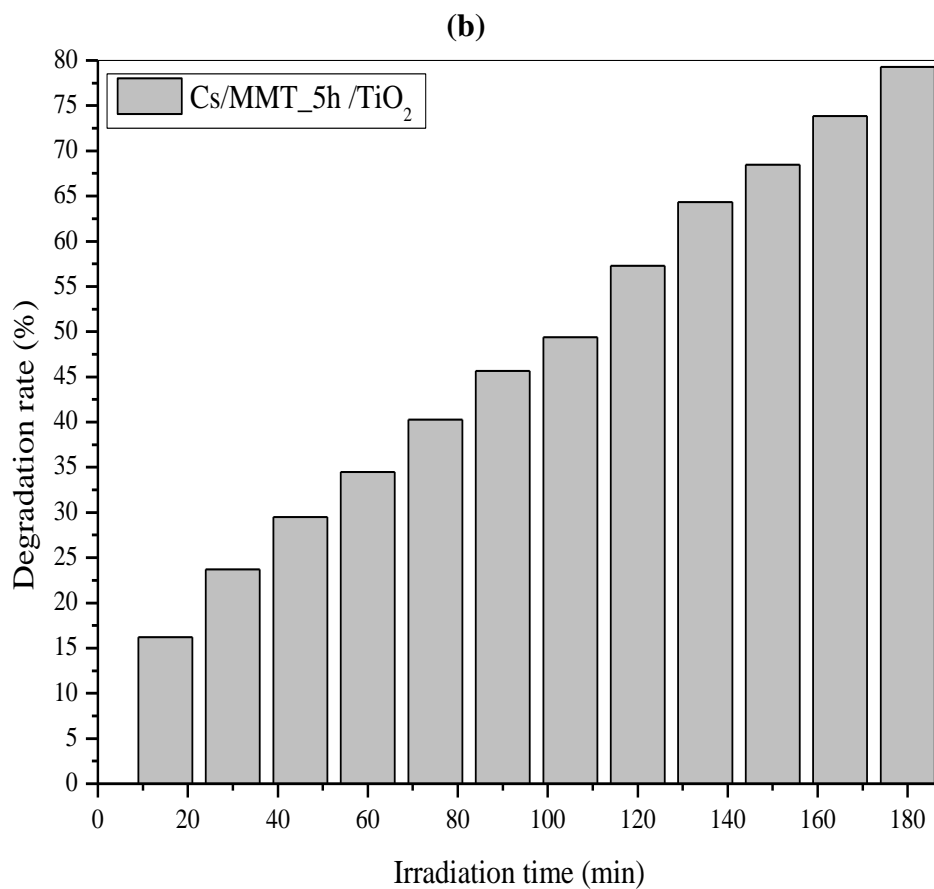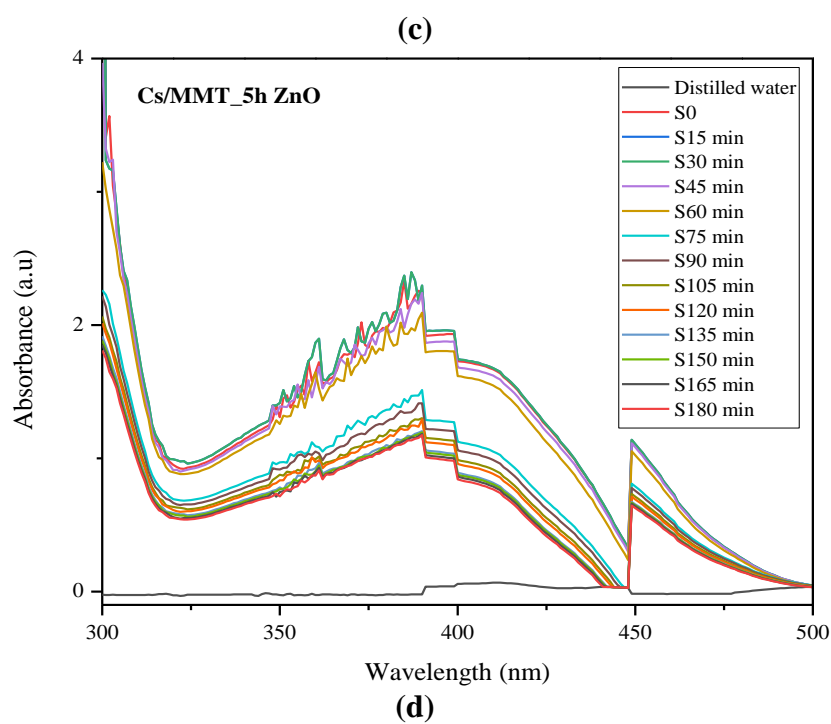

**Supplementary Materials:** Establishing the Link Across the Synthesis Reaction Kinetics, Structural Changes, and Photocatalytic Efficiency of an En-hanced Chitosan-Clay (1:3) Nanocomposite

Wael ALBOUCHI, Malek Lahbib, Chadha MEJRI , Sana JEBALI, Mahdi Meftah, Walid OUESLATI\* 

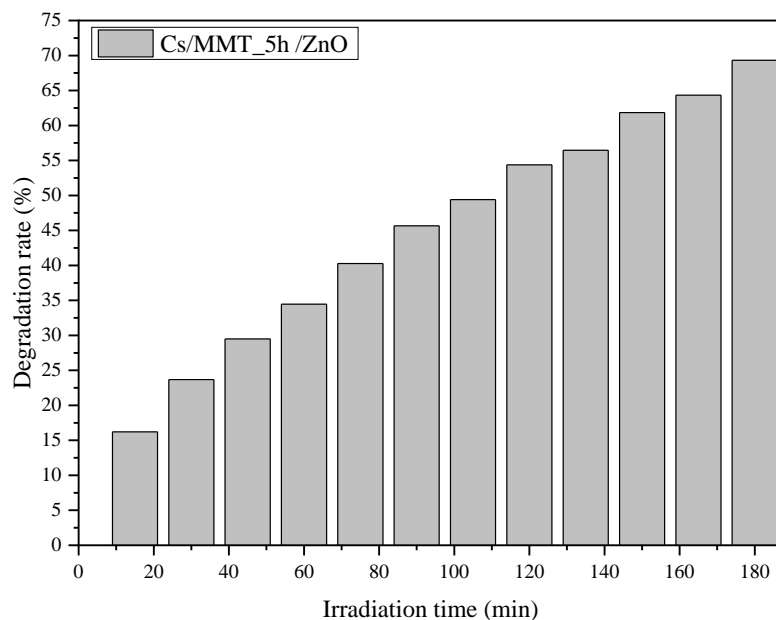

Figure S4: (a) Catalytic degradation of CBY3G-P by Cs/MMT nanocomposites 5h in the presence of  $\text{TiO}_2$ , (b) Photocatalytic degradation rate of CBY3G-P dye on Cs/MMT,  $\text{TiO}_2$  5h under 180 min of irradiation, (c) Catalytic degradation of CBY3G-P by Cs/MMT nanocomposites 5h in the presence of ZnO, and (d) Photocatalytic degradation rate of CBY3G-P dye on Cs/MMT, ZnO 5h under 180 min of irradiation.

(a)

**Supplementary Materials:** Establishing the Link Across the Synthesis Reaction Kinetics, Structural Changes, and Photocatalytic Efficiency of an En-hanced Chitosan-Clay (1:3) Nanocomposite

Wael ALBOUCHI, Malek Lahbib, Chadha MEJRI , Sana JEBALI, Mahdi Meftah, Walid OUESLATI\* 

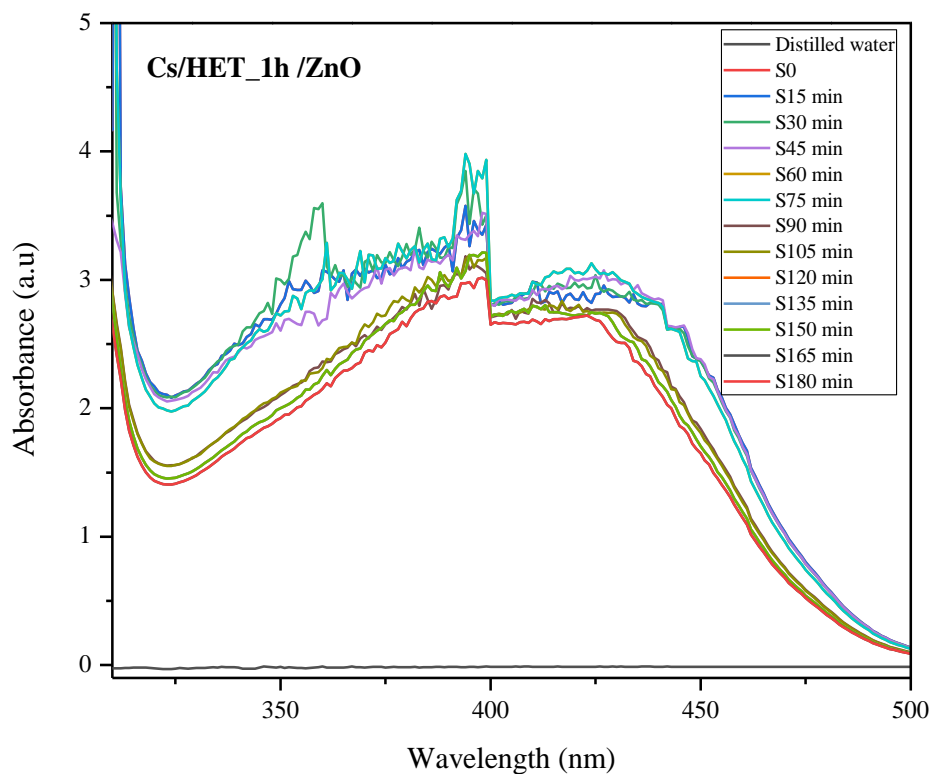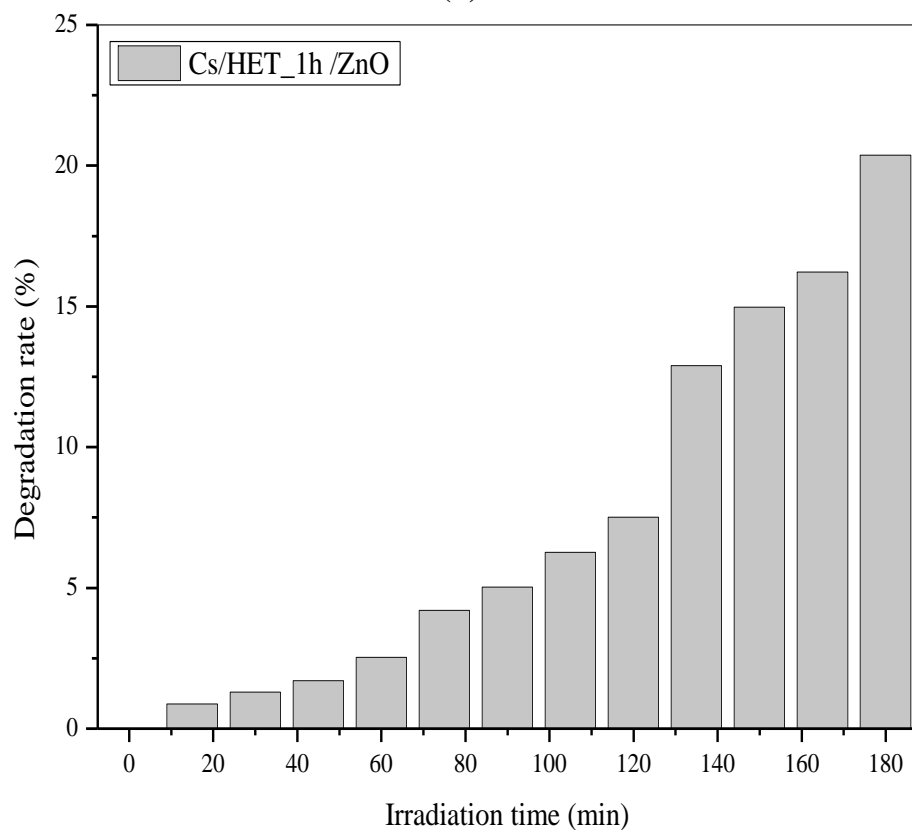

**Supplementary Materials:** Establishing the Link Across the Synthesis Reaction Kinetics, Structural Changes, and Photocatalytic Efficiency of an En-hanced Chitosan-Clay (1:3) Nanocomposite

Wael ALBOUCHI, Malek Lahbib, Chadha MEJRI , Sana JEBALI, Mahdi Meftah, Walid OUESLATI\* 

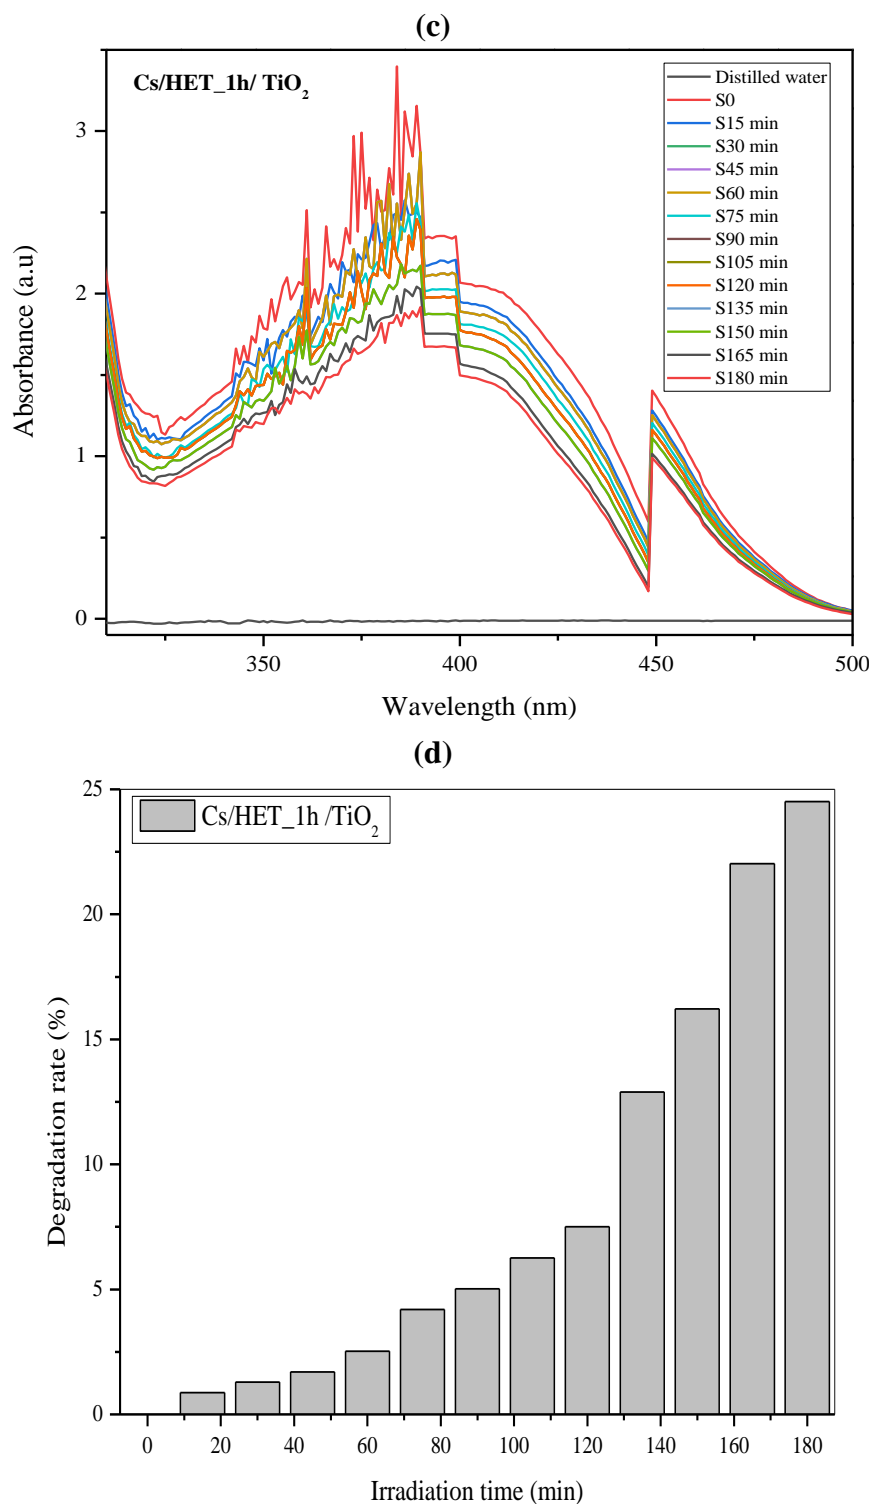

**Figure S5:** (a) Catalytic degradation of CBY3G-P by Cs/HET nanocomposites 1h in the presence of  $\text{TiO}_2$ , (b) Photocatalytic degradation rate of CBY3G-P dye on Cs/HET,  $\text{TiO}_2$  1h under 180 min of irradiation, (c) Catalytic degradation of CBY3G-P by Cs/HET nanocomposites 1h in the presence of  $\text{ZnO}$ , and (d) Photocatalytic degradation rate of CBY3G-P dye on Cs/HET,  $\text{ZnO}$  1h under 180 min of irradiation.

**(a)**

**Supplementary Materials:** Establishing the Link Across the Synthesis Reaction Kinetics, Structural Changes, and Photocatalytic Efficiency of an En-hanced Chitosan-Clay (1:3) Nanocomposite

Wael ALBOUCHI, Malek Lahbib, Chadha MEJRI , Sana JEBALI, Mahdi Meftah, Walid OUESLATI\* 

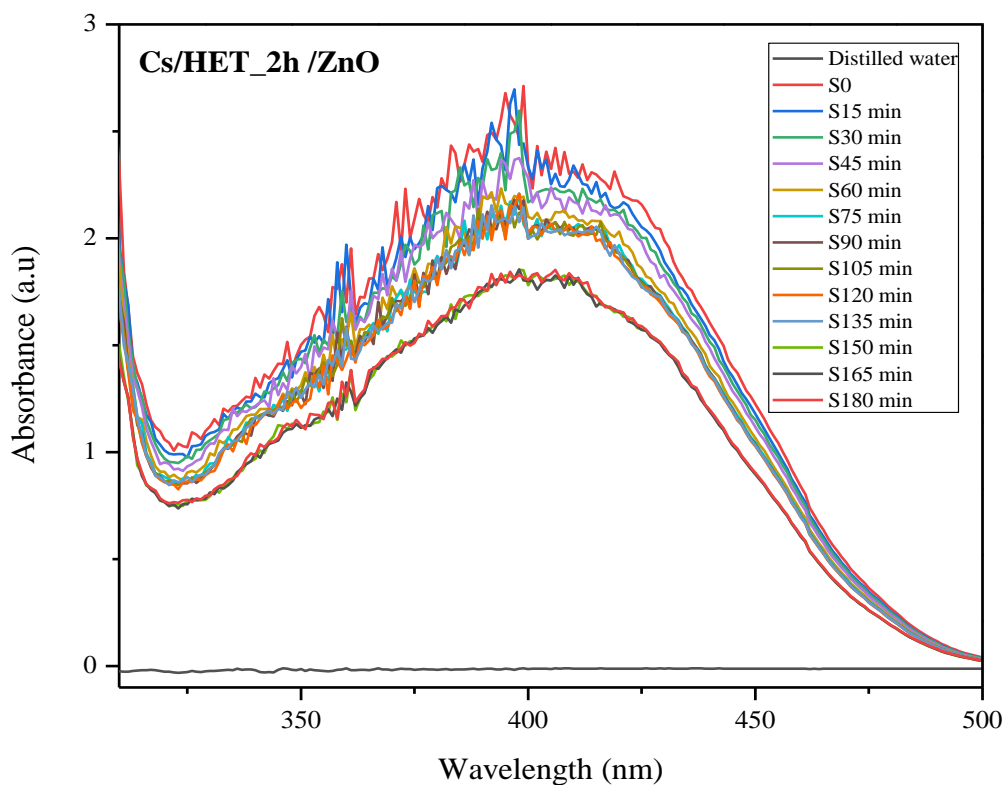

(b)

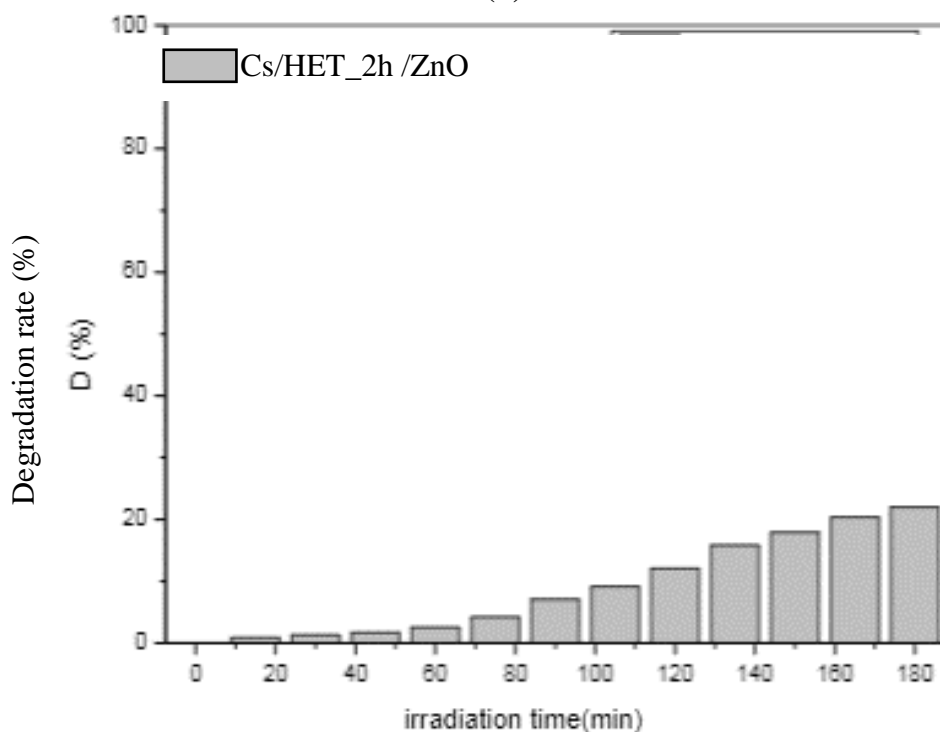

(c)

**Supplementary Materials:** Establishing the Link Across the Synthesis Reaction Kinetics, Structural Changes, and Photocatalytic Efficiency of an En-hanced Chitosan-Clay (1:3) Nanocomposite

Wael ALBOUCHI, Malek Lahbib, Chadha MEJRI , Sana JEBALI, Mahdi Meftah, Walid OUESLATI\* 

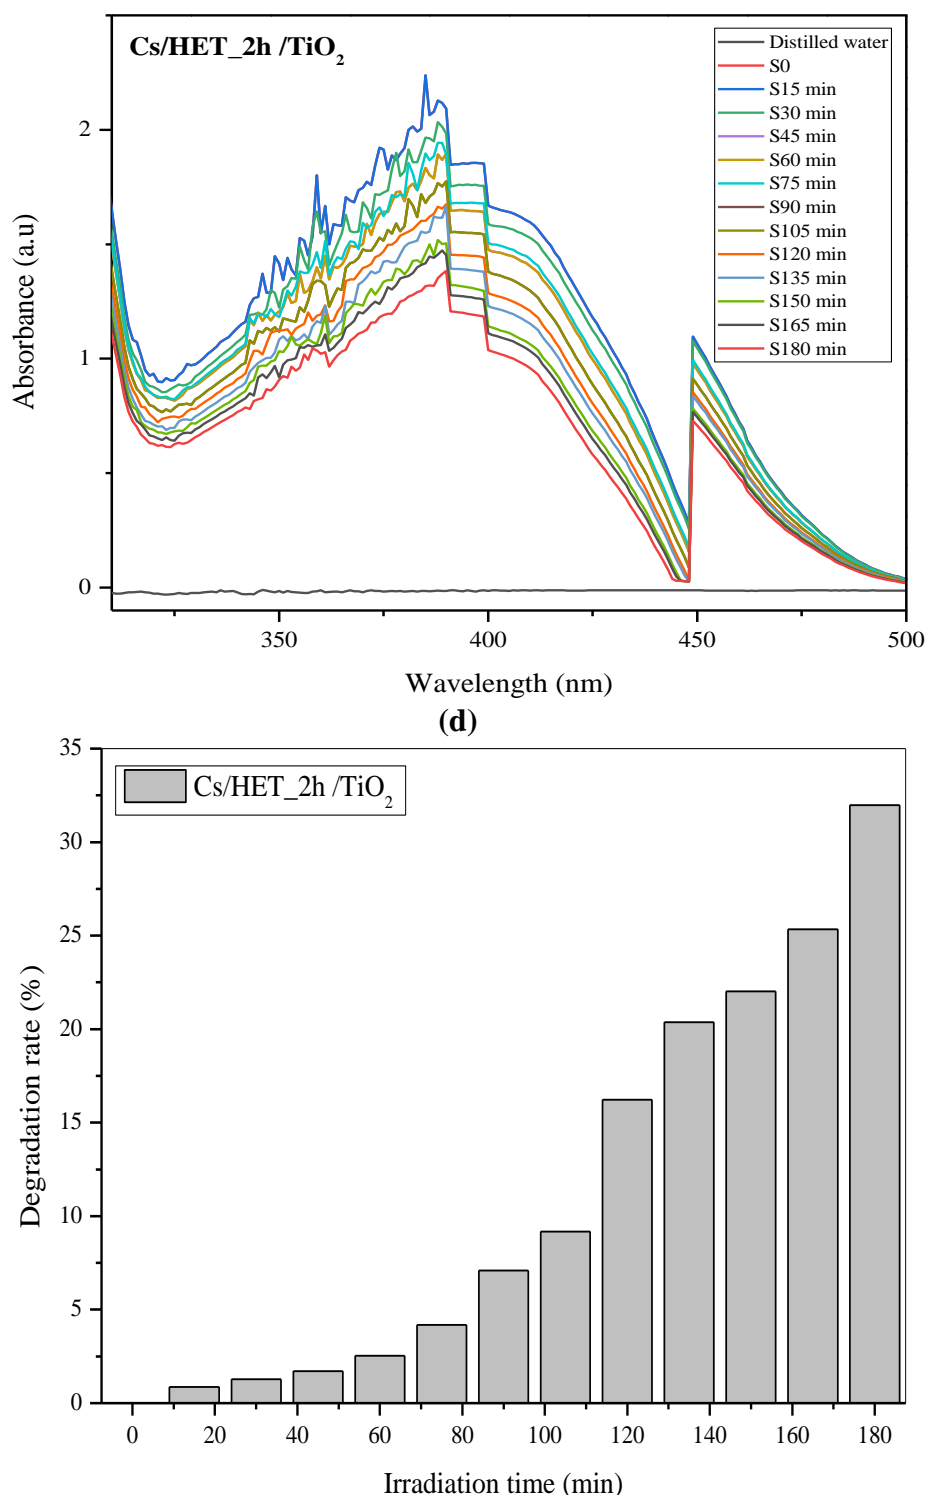

Figure S6: (a) Catalytic degradation of CBY3G-P by Cs/HET nanocomposites 2h in the presence of TiO<sub>2</sub>, (b) Photocatalytic degradation rate of CBY3G-P dye on Cs/HET, TiO<sub>2</sub> 2h under 180 min of irradiation, (c) Catalytic degradation of CBY3G-P by Cs/HET nanocomposites 2h in the presence of ZnO, and (d) Photocatalytic degradation rate of CBY3G-P dye on Cs/HET, ZnO 2h under 180 min of irradiation.

**(a)**

**Supplementary Materials:** Establishing the Link Across the Synthesis Reaction Kinetics, Structural Changes, and Photocatalytic Efficiency of an En-hanced Chitosan-Clay (1:3) Nanocomposite

Wael ALBOUCHI, Malek Lahbib, Chadha MEJRI , Sana JEBALI, Mahdi Meftah, Walid OUESLATI\* 

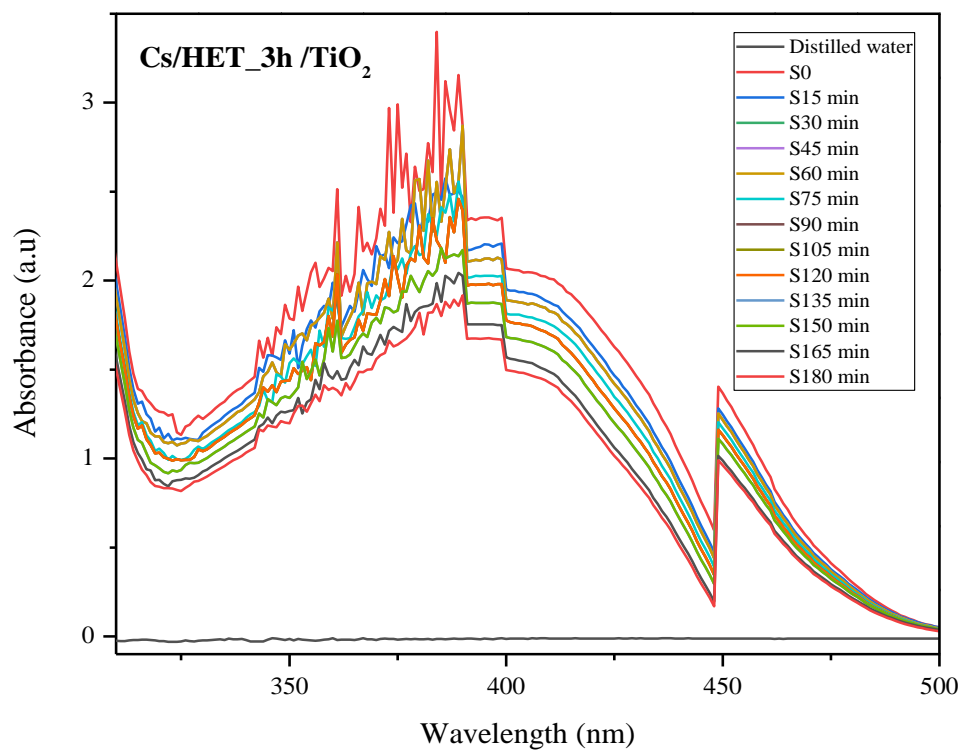

**(b)**

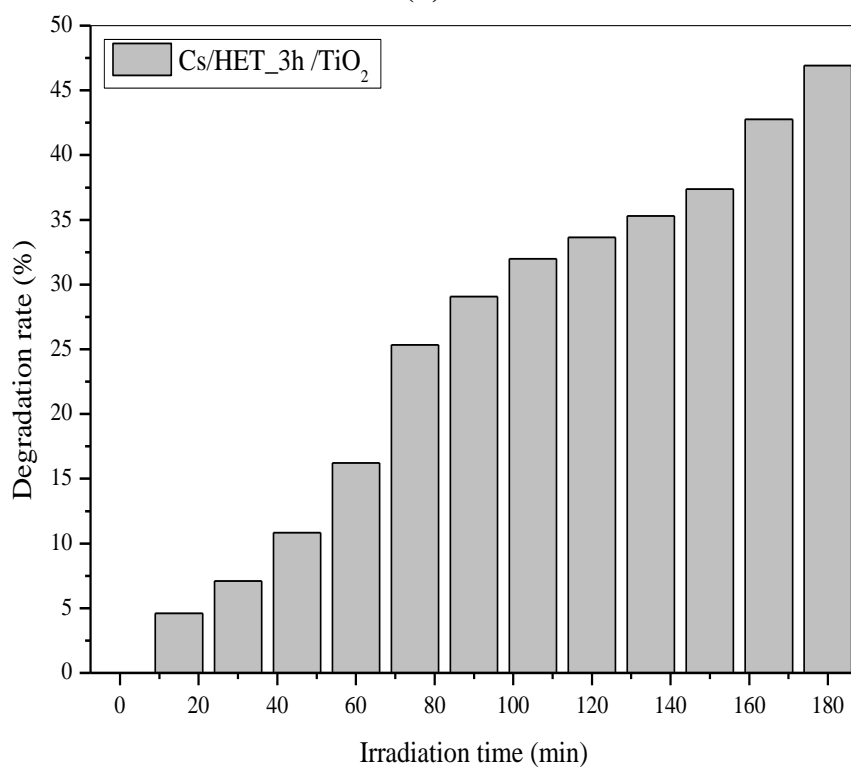

**(c)**

**Supplementary Materials:** Establishing the Link Across the Synthesis Reaction Kinetics, Structural Changes, and Photocatalytic Efficiency of an En-hanced Chitosan-Clay (1:3) Nanocomposite

Wael ALBOUCHI, Malek Lahbib, Chadha MEJRI , Sana JEBALI, Mahdi Meftah, Walid OUESLATI\* 

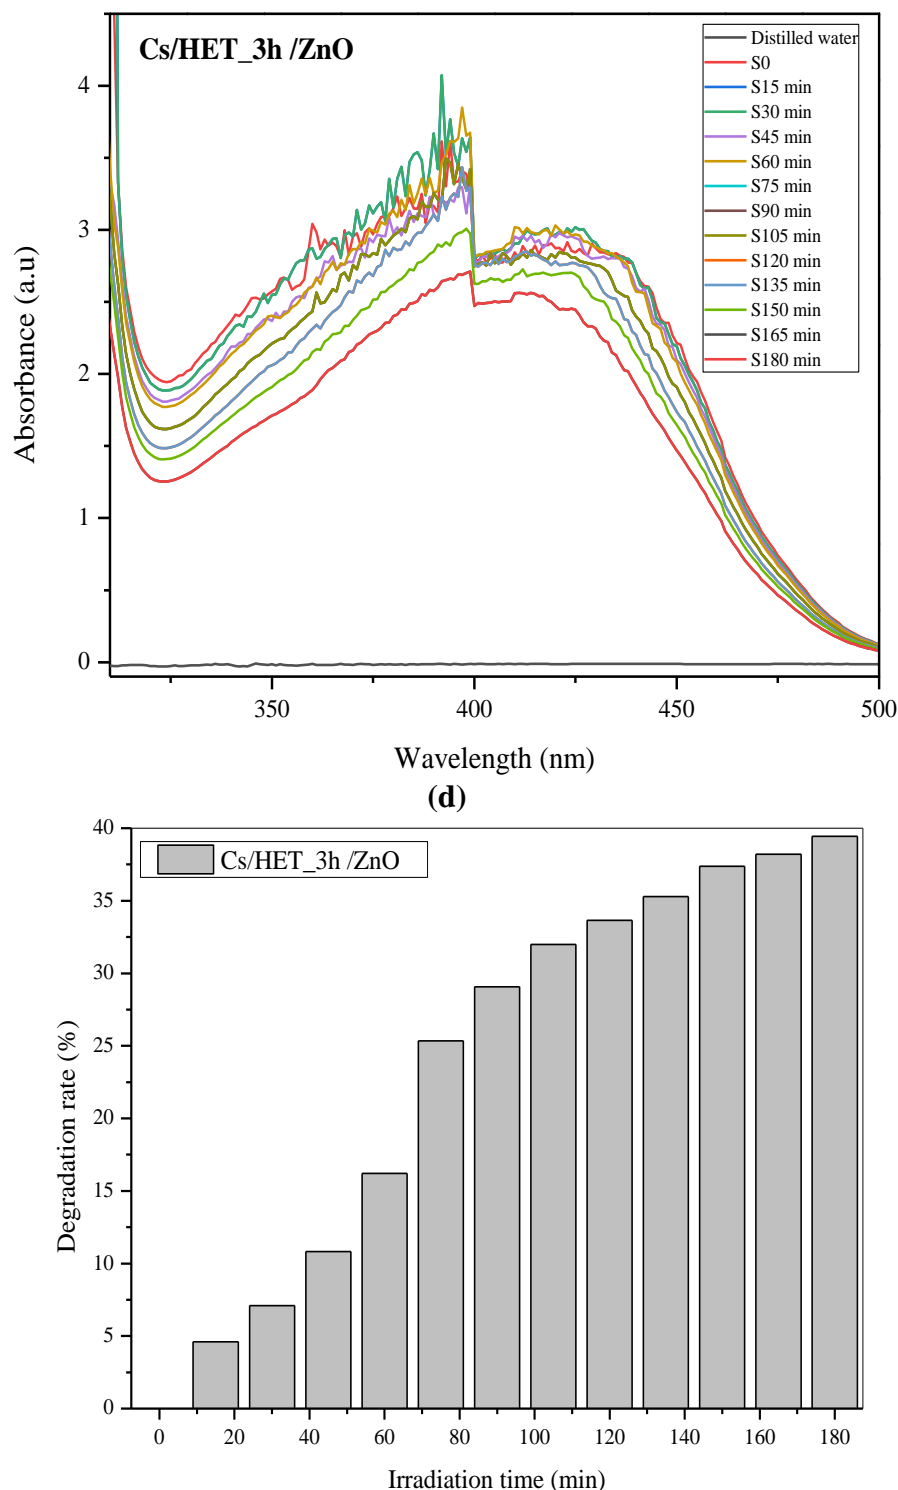

Figure S7: (a) Catalytic degradation of CBY3G-P by Cs/HET nanocomposites 3h in the presence of  $\text{TiO}_2$ , (b) Photocatalytic degradation rate of CBY3G-P dye on Cs/HET,  $\text{TiO}_2$  3h under 180 min of irradiation, (c) Catalytic degradation of CBY3G-P by Cs/HET nanocomposites 3h in the presence of ZnO, and (d) Photocatalytic degradation rate of CBY3G-P dye on Cs/HET, ZnO 3h under 180 min of irradiation.

(a)

**Supplementary Materials:** Establishing the Link Across the Synthesis Reaction Kinetics, Structural Changes, and Photocatalytic Efficiency of an En-hanced Chitosan-Clay (1:3) Nanocomposite

Wael ALBOUCHI, Malek Lahbib, Chadha MEJRI , Sana JEBALI, Mahdi Meftah, Walid OUESLATI\* 

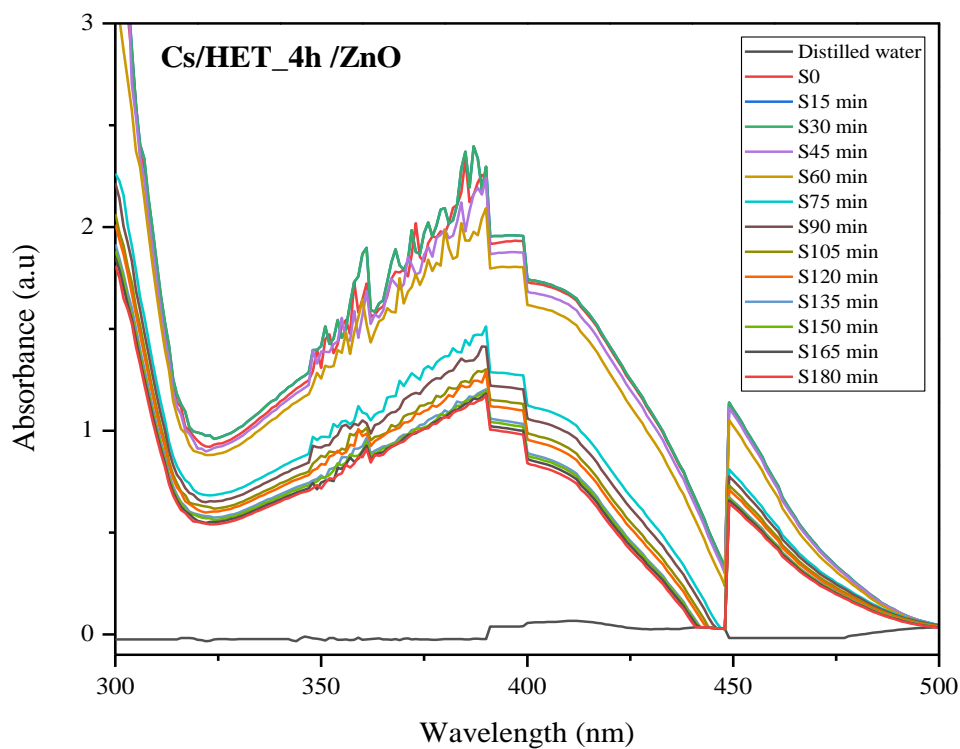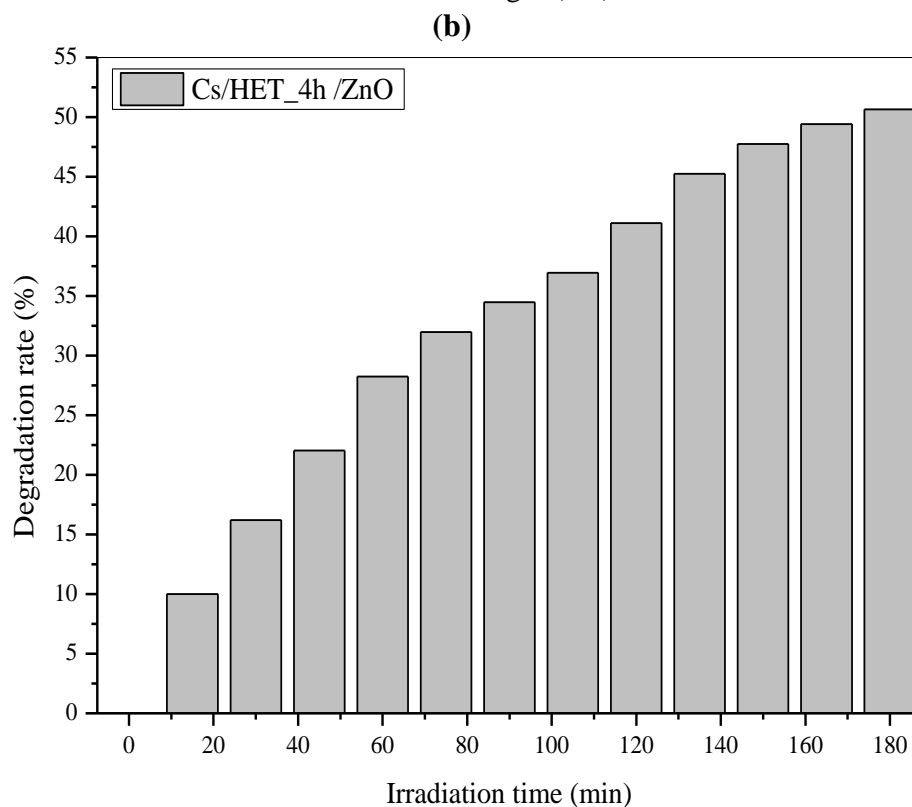

**Supplementary Materials:** Establishing the Link Across the Synthesis Reaction Kinetics, Structural Changes, and Photocatalytic Efficiency of an En-hanced Chitosan-Clay (1:3) Nanocomposite

Wael ALBOUCHI, Malek Lahbib, Chadha MEJRI , Sana JEBALI, Mahdi Meftah, Walid OUESLATI\* 

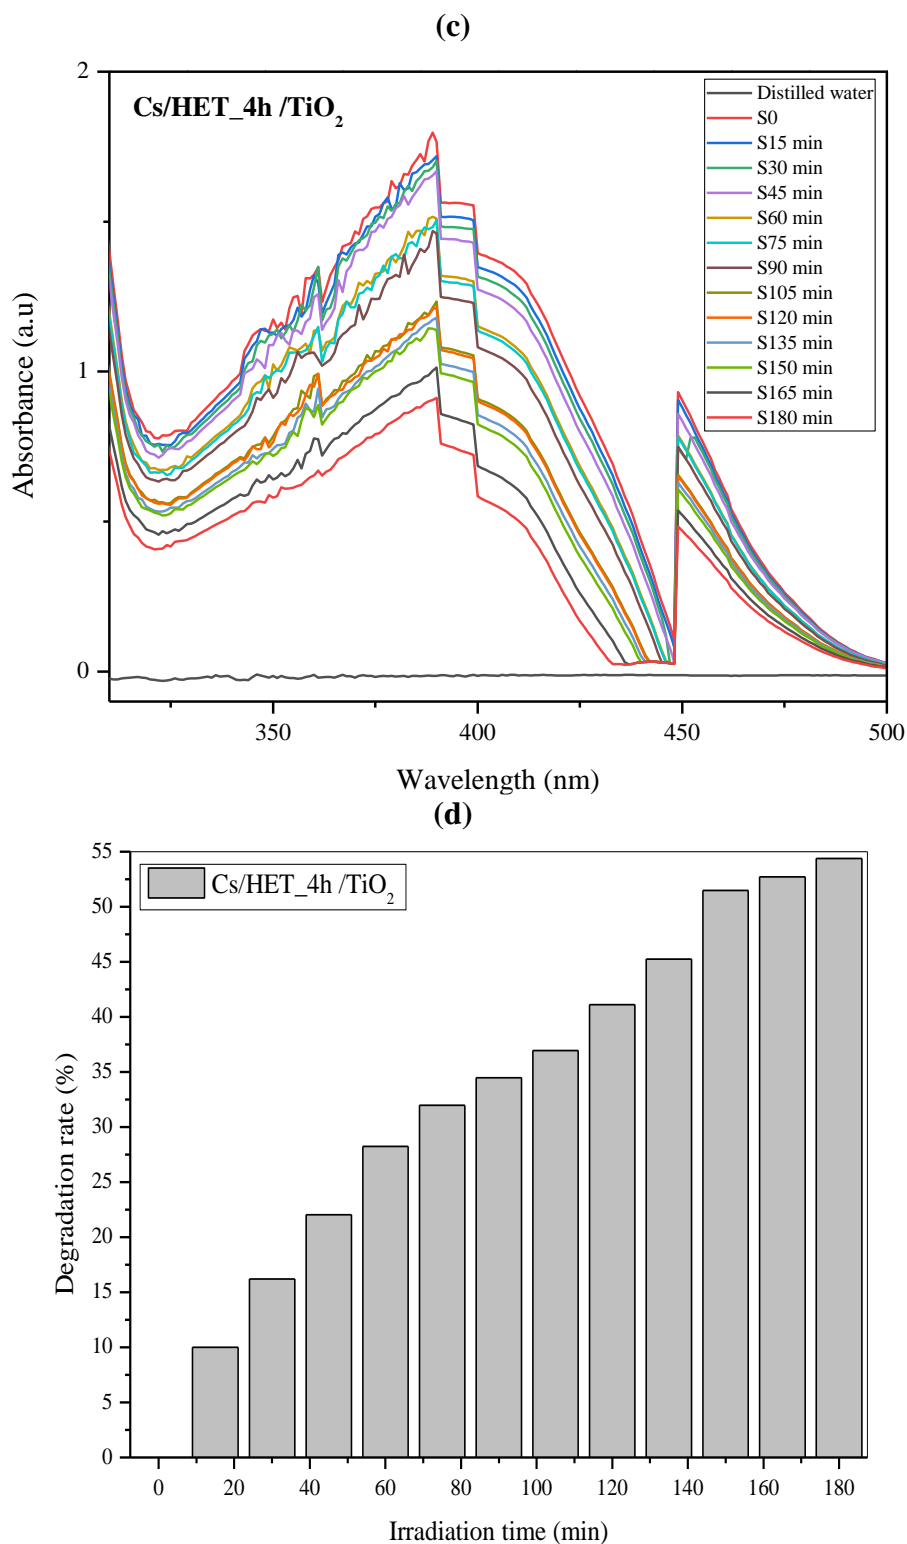

Figure S8: (a) Catalytic degradation of CBY3G-P by Cs/HET nanocomposites 4h in the presence of  $\text{TiO}_2$ , (b) Photocatalytic degradation rate of CBY3G-P dye on Cs/HET,  $\text{TiO}_2$  4h under 180 min of irradiation, (c) Catalytic degradation of CBY3G-P by Cs/HET nanocomposites 4h in the presence of  $\text{ZnO}$ , and (d) Photocatalytic degradation rate of CBY3G-P dye on Cs/HET,  $\text{ZnO}$  4h under 180 min of irradiation.

**Supplementary Materials:** Establishing the Link Across the Synthesis Reaction Kinetics, Structural Changes, and Photocatalytic Efficiency of an En-hanced Chitosan-Clay (1:3) Nanocomposite

Wael ALBOUCHI, Malek Lahbib, Chadha MEJRI , Sana JEBALI, Mahdi Meftah, Walid OUESLATI\* 

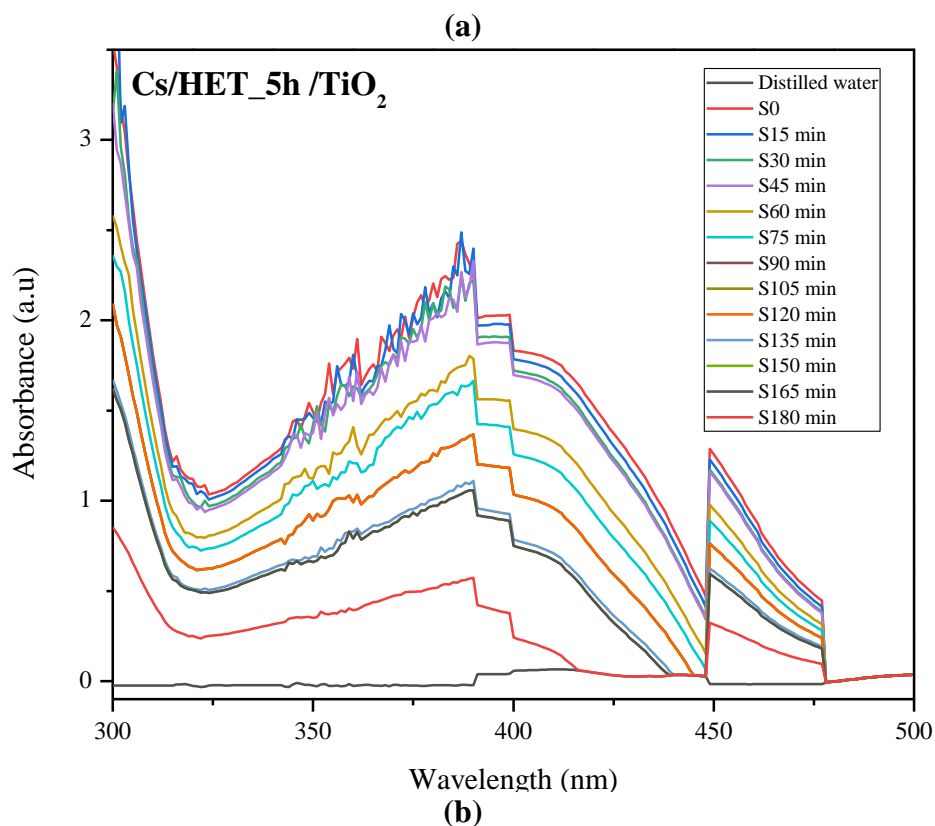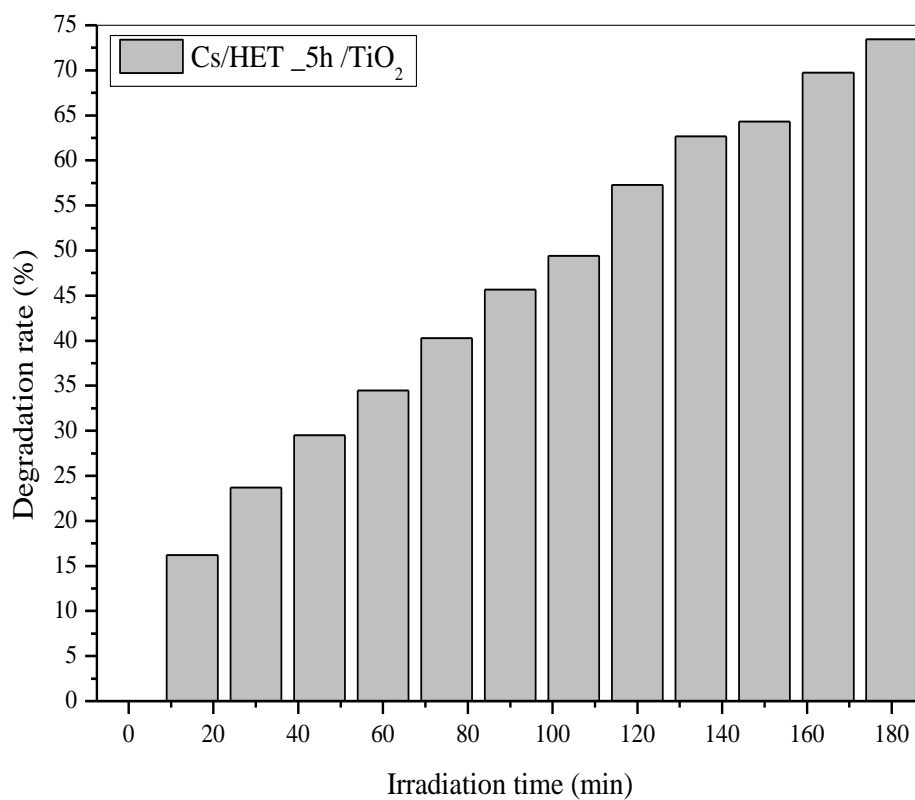

(c)

**Supplementary Materials:** Establishing the Link Across the Synthesis Reaction Kinetics, Structural Changes, and Photocatalytic Efficiency of an En-hanced Chitosan-Clay (1:3) Nanocomposite

Wael ALBOUCHI, Malek Lahbib, Chadha MEJRI , Sana JEBALI, Mahdi Meftah, Walid OUESLATI\* 

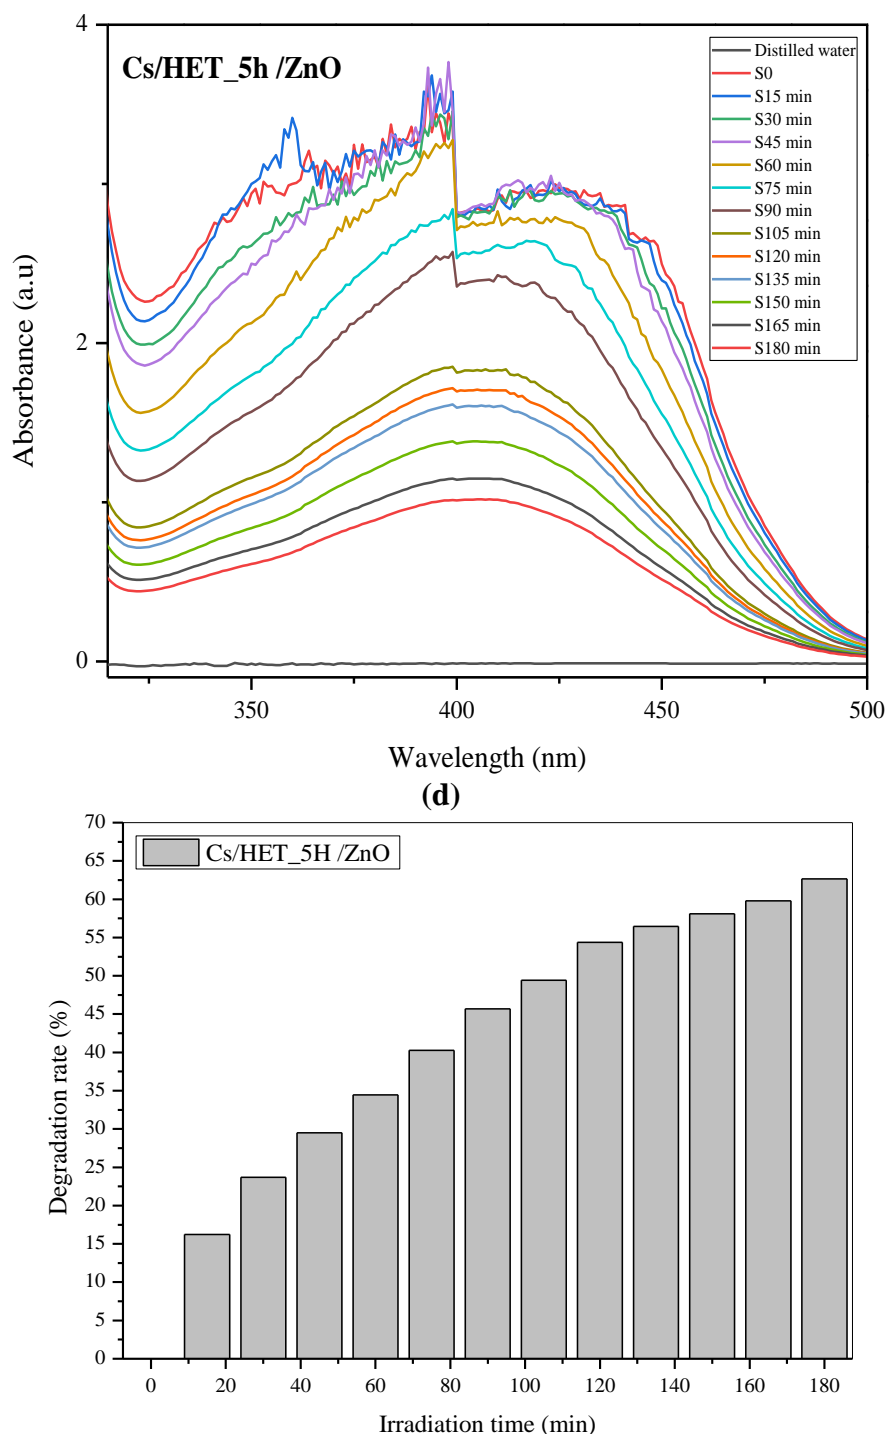

**Figure S9:** (a) Catalytic degradation of CBY3G-P by Cs/HET nanocomposites 5h in the presence of  $\text{TiO}_2$ , (b) Photocatalytic degradation rate of CBY3G-P dye on Cs/HET,  $\text{TiO}_2$  5h under 180 min of irradiation, (c) Catalytic degradation of CBY3G-P by Cs/HET nanocomposites 5h in the presence of ZnO, and (d) Photocatalytic degradation rate of CBY3G-P dye on Cs/HET, ZnO 5h under 180 min of irradiation.
